# Supplementary material
Source: PubMed Central journal article supplement (PMC3100968)
Supplement: 1017700108_pnas.1017700108_SI.pdf [file 1017700108_pnas.1017700108_SI.pdf]

# Supporting Information

Cho et al. 10.1073/pnas.1017700108

## SI Materials and Methods

**Gene Cloning.** SRSF1 mutants (FL and RRM1/2), premRNA templates  $\beta$ -globin (*Ron*) and  $\beta$ -globin (*Ron*) ( $\Delta$ AG) were generated by single or sequential PCR mutagenesis or site-directed mutagenesis kit (Stratagene) (primer sequences are listed in Table S1). Template plasmids were generated from the parental pSP64-H $\beta$  $\Delta$ 6 plasmid (1). DNA fragments corresponding to U1-70K (FL), N-RRM (1–230), RRM (92–230), RRM (59–215), and RS (230–437) were cloned into pET15b vector using the U1-70K cDNA (open biosystems) as the template. GST-SRSF2 (RRM), (residues 1–93) was cloned in pGEX4T2 using PCR.

**In Vitro Transcription/Translation.** Different U1-70K constructs (2  $\mu$ g) were subjected to in vitro transcribed/translation with 2  $\mu$ l [<sup>35</sup>S]-Met (1,000 Ci/mmol at 10 mCi/mL) and 40  $\mu$ l of rabbit reticulocyte lysate mix (TnT system, Promega) in total 50  $\mu$ l reaction for 2 hours at 30 °C.

**Protein Purification.** His-SRSF1 (FL,  $\Delta$ RS2) and SRSF1 (FL) (RARA, RERA, and RERE) mutants were expressed in *Escherichia coli* BL21 (DE3) pLysS and induced with 1 mM IPTG for 3 hours at room temperature. His-tag proteins were purified using the methods as described (2) and purified further by size-exclusion chromatography (Superdex 75, 16/60; GE Healthcare) in 20 mM Tris-HCl (pH 5.0), 500 mM NaCl, 100 mM MOPS, 10% glycerol, and 1 mM DTT. For in vitro splicing and splicing complex formation assay, proteins were dialyzed or purified in 20 mM HEPES (pH 7.9), 300 mM KCl, 20% glycerol, 0.5 mM DTT, and 0.2 mM EDTA and further separated by size-exclusion chromatography (Superdex 75, 16/60; GE Healthcare). GST-SRSF1 (WT, RSRA, RSRE, RARA, RERA, and RERE), GST-SRSF1 (RRMs) (WT, RRM1, RRM2, and RS), and GST-SRSF2 (RRM) were cloned into pGEX4T2 vector and expressed in *E. coli* BL21 (DE3). Cells were induced at O.D.<sub>600</sub> of 0.4 with 0.5 mM IPTG and cultured for 3 hours at 30 °C. The proteins were purified on DEAE sephacel (Pharmacia) column in tandem with glutathione sepharose (Amersham) column that had been equilibrated with 20 mM Tris-HCl (pH 7.5), 500 mM NaCl, 10% glycerol, 0.2 mM EDTA (pH 8.0), 5 mM DTT, and 1 mM PMSF. Further purification was achieved using size-exclusion chromatography. His-SRSF1 (RRM1/2) WT and mutants were purified in M9-based minimal media and induced with 1 mM IPTG for 3 hour at 37 °C. The protein was purified in 20 mM Tris-HCl (pH 7.5), 500 mM NaCl, 10% glycerol, 10 mM  $\beta$ -mercaptoethanol using Ni-NTA agarose (Qiagen) column and DEAE and further separated using size-exclusion chromatography (Superdex 75, 16/60; GE Healthcare) at room temperature. For the splicing assay, proteins were dialyzed or purified in 20 mM HEPES (pH 7.9), 300 mM KCl, 20% glycerol, 0.5 mM DTT, and 0.2 mM EDTA. His-tag U1-70K (residues 59–215) using a pET15b vector was cultured in M9-based minimal media and induced with 1 mM IPTG for 3 hours at 25 °C. The protein was purified on DEAE sephacel column in tandem with a Ni-NTA agarose (Qiagen) column equilibrated with 20 mM Tris-HCl (pH 7.5), 500 mM NaCl, 10% glycerol, 10 mM  $\beta$ -ME, and 1 mM PMSF. SRPK1 and CLK/STY were purified as described (2).

**Protein Phosphorylation.** For hypo-phosphorylation, SRSF1 was phosphorylated for 2 hours at 30 °C by His-SRPK1 in kinase buffer (50 mM Tris-HCl (pH 7.5), 50 mM NaCl, 1 mM DTT, 5 mM MgCl<sub>2</sub>, 10% glycerol, 1 mM ATP and 1 $\times$  phosphatase inhibitor) with a 5:1 molar ratio (SRSF1:SRPK1). For hyper-phosphorylation, SRSF1 was incubated first with SRPK1 for 1 hour and then CLK/STY was added in a 10:1 molar ratio (SRSF1:CLK/STY) for an additional 1 hour at 30 °C.

**EMSA.** 10 fmol of [ $\gamma$ -<sup>32</sup>P]-ATP labeled RNA was incubated with SRSF1 for 30 min at 4 °C in buffer A containing 20 mM Tris-HCl (pH 7.5), 75 mM NaCl, 0.01 mg/mL BSA, 0.1% NP40, 1 mM DTT, 5 mM MgCl<sub>2</sub>, 10% glycerol and 5 U RNase inhibitor with 1  $\mu$ g polyU as a nonspecific competitor. Binding reaction products were resolved on a 6% or 6.5% polyacrylamide native gel (acrylamide:bisacrylamide = 29:1) containing 5% glycerol in 1X TBE. All gels were ran at 400 V for 1 hour at 4 °C, dried and analyzed by phosphorimaging.

**Filter Binding Assay.** 10 fmol of [ $\gamma$ -<sup>32</sup>P]-ATP labeled ESE was incubated with SRSF1 in 100  $\mu$ l buffer A at 4 °C for 40 min. The reaction mixtures were diluted 1:10 with 900  $\mu$ l cold buffer A containing 1  $\mu$ g polyU and immediately filtered through nitrocellulose membranes (Millipore, 0.45  $\mu$ m) at a flow rate of 0.5 mL/min and rinsed with 5 mL cold buffer A. Membranes were dried at 60 °C for 1 hour and the amount of bound RNA was measured using liquid scintillation counter. The 0% (baseline) and 100% (maximum binding) was determined by spotting the probe with filtering with and without washing respectively.  $K_d$  was calculated as the protein concentration required for 50% RNA binding. Each experiment was repeated at least three times.

**GST Pull-Down Assay.** GST-fusion proteins (10  $\mu$ g) were mixed with purified target proteins (10  $\mu$ g) or in vitro translated U1-70K (5  $\mu$ l) in buffer B containing 20 mM Tris-HCl (pH 7.5), 100 mM NaCl, 10% glycerol, 1 mM DTT and 0.5% NP40 at 4 °C for 30 min followed by further incubation with 15  $\mu$ l glutathione sepharose resin (Amersham) for 30 min at 4 °C. Resins were washed three times with 400  $\mu$ l buffer B and the bound protein was eluted by boiling with 4 $\times$  gel loading dye for 5 min at 80 °C and was resolved by SDS/PAGE. Separated proteins were visualized by coomassie staining, western blotting or autoradiography. Quantitation of gel images was performed using GelquantNET (1.7.4).

**In Vitro Splicing Assay.**  $\beta$ -globin(wt) in pSP64-H $\beta$  $\Delta$ 6(1) and  $\beta$ -globin (*Ron*) in pcDNA3 plasmids were linearized and transcribed with SP6 RNA polymerase and T7 RNA polymerase, respectively, in the presence of [ $\alpha$ -<sup>32</sup>P]-UTP. Pre-mRNA was incubated with HeLa nuclear or cytoplasmic S100 extracts in the presence of WT and mutant SRSF1 both full length and RRM as described (3). RNA was extracted and analyzed by denaturing PAGE and phosphorimage analysis on a FUJIFILM FLA-5100 instrument (Fuji Medical Systems USA, Inc.). Quantitation of gel images was performed using GelquantNET (1.7.4).

1. Krainer AR, Maniatis T, Ruskin B, Green MR (1984) Normal and mutant human beta-globin pre-mRNAs are faithfully and efficiently spliced in vitro. *Cell* 36:993–1005.  
2. Velazquez-Dones A, et al. (2005) Mass spectrometric and kinetic analysis of ASF/SF2 phosphorylation by SRPK1 and Clk/Sty. *J Biol Chem* 280:41761–41768.

3. Mayeda A, Krainer AR (1999) Preparation of HeLa cell nuclear and cytosolic S100 extracts for in vitro splicing. *Methods Mol Biol* 118:309–314.







Table S1. Primer list

| Name                                       | SEQUENCES                                                                                                                                          | Mutated domain                                                | Template vector                |
|--------------------------------------------|----------------------------------------------------------------------------------------------------------------------------------------------------|---------------------------------------------------------------|--------------------------------|
| 5'SRSF1(1-X)                               | AATTCATATGATGTAATGTCGGGAGGTGGTGTGATTC                                                                                                              |                                                               | SRSF1(1-X)                     |
| 3'SRSF1-RA1                                | GATCGGATCCTTAGGCTCTAGCACGTGCTCTCGCACGGGCACGCGCTCGGGCTCGCGCTC<br>TTCCATAACTTGGACTTCTGGG                                                             | RS1 to RA1                                                    | SRSF1(1-219)                   |
| 3'SRSF1-RE1                                | GATCGGATCCTTACTCTCTTTACGCTCTCTTTACGCTCACGTTCTCGCTCTCGTTCTCTTC<br>CATAACTTGGACTTCTGGG                                                               | RS1 to RE1                                                    | SRSF1(1-219)                   |
| 3'SRSF1-RSRA                               | GATCGGATCCTTATGTACGCGCGCGCTCTCGCATGACGGGGCGCATAGCGTGGCGCTC<br>CTCTCGCTCTCCTTGGGGAGTAACTGCG                                                         | RSRS to RSRA                                                  | SRSF1(1-248)                   |
| 3'SRSF1-RSRE                               | GATCGGATCCTTATGTACGTTGCGTTCTCTTTATGACGGGGTTCATAGCGTGGTTCTCCT<br>CTTCTCTCCTTGGGGAGTAACTGCG                                                          | RSRS to RSRE                                                  | SRSF1(1-248)                   |
| 3'SRSF1-RARA                               | GATCGGATCCTTATGTACGCGCGCGCTCTCGCATGACGGGGCGCATAGCGTGGCGCTC<br>CTCTCGCTCTCCTTGGCGCGTATGCGCGAGCCCTCGGTTGGCTCTAGCACGTGCTCTCG                          | RA1 to RARA                                                   | SRSF1(1-219, RA1)              |
| 3'SRSF1-RERA                               | GATCGGATCCTTATGTACGCGCGCGCTCTCGCATGACGGGGCGCATAGCGTGGCGCTCC<br>TCTCGCTCTCCTTGGTTCGTATTGCGGTTCCCTTTGTTCTCTTTACGCTCTCTTTAC                           | RE1 to RERA                                                   | SRSF1(1-219, RE1)              |
| 3'SRSF1-RERE                               | GATCGGATCCTTATGTACGTTGCGTTCTCTTTATGACGGGGTTCATAGCGTGGTTCTCCT<br>CTTCTCTCCTTGGTTCGTATTGCGGTTCCCTTTGTTCTCTTTACGCTCTCTTTAC                            | RE1 to RERE                                                   | SRSF1(1-219, RE1)              |
| $\beta$ -globin ( <i>Ron</i> )             | Forward: CCCTTAGGCTGCTGGTGGGTACCGCGGAGGAAGCCTTGGACCCAGAGGTTCT<br>TTTG Reverse: CAAAGAACCCTCTGGTCCAAGGCTTCTCCGCCGGTACC<br>CACCAGCAGCCTAAGGG         | $\beta$ -globin ( <i>Ron</i> )<br>(inserted <i>Ron</i> ESE)   | $\beta$ -globin                |
| $\beta$ -globin ( <i>Ron</i> ) $\Delta$ AG | Forward: CTCTCTGCCTATTGGTCTATTTCCCTCTCTCTGGCCA T GTGGTG GGTACCG<br>GCGGAG Reverse: CTCCGCCGGTACCACCACATGGCCAGAGAGAGAGGGAAAATA<br>GACCAATAGGCAGAGAG | $\beta$ -globin ( <i>Ron</i> ) $\Delta$ AG<br>(3'SS mutation) | $\beta$ -globin ( <i>Ron</i> ) |
| SRSF1 (I32A, V35A)                         | CATCCGAACCAAGGACGCTGAGGACGCGTTCTACAAATACGGC                                                                                                        | SRSF1 (FL, RRM1/2)<br>mut1                                    | SRSF1 (FL)                     |
| SRSF1 (K38A, Y39A)                         | GGACATTGAGGACGTGTTCTACGCGGCCGGCGCTATCCGCGAC                                                                                                        | SRSF1 (FL, RRM1/2)<br>mut2                                    | SRSF1 (FL)                     |
| SRSF1 (D66A, D69A)                         | GGACCCGCGAGCCGCGGAAGCCGCGGTGTATGG                                                                                                                  | SRSF1 (FL, RRM1/2)<br>mut3                                    | SRSF1 (FL)                     |
| SRSF1 (F56D, F58D)                         | GCCGCGGGGACCGCCGACGCCGACGTTGAGTTCGAGGACCC                                                                                                          | SRSF1 (FL, RRM1/2)<br>mut FF-DD                               | SRSF1 (FL)                     |
